# Supplementary material
Source: PubMed Central journal article supplement (PMC9649766)
Supplement: 41598_2022_23667_MOESM1_ESM.pdf [file 41598_2022_23667_MOESM1_ESM.pdf]

**Supplementary Table. S1**

| <b>Gene Name</b> | <b>Gene Name Full</b>                                    | <b>TaqMan ID</b> |
|------------------|----------------------------------------------------------|------------------|
| <i>TFEB</i>      | Transcription Factor EB                                  | Hs00292981_m1    |
| <i>ZKSCAN3</i>   | Zinc Finger With KRAB And SCAN Domains 3                 | Hs00383244_m1    |
| <i>HIF1A</i>     | Hypoxia Inducible Factor 1 Subunit Alpha                 | Hs00153153_m1    |
| <i>I-CAM</i>     | Intercellular Adhesion Molecule 1                        | Hs00164932_m1    |
| <i>FOXO1</i>     | Forkhead Box O1                                          | Hs00231106_m1    |
| <i>EPG5</i>      | Ectopic P-Granules Autophagy Protein 5 Homolog           | Hs01125502_m1    |
| <i>Rubicon</i>   | Rubicon Autophagy Regulator                              | Hs00943570_m1    |
| <i>LAMP2</i>     | Lysosomal Associated Membrane Protein 2                  | Hs00174474_m1    |
| <i>LAMP3</i>     | Lysosomal Associated Membrane Protein 3                  | Hs01111316_m1    |
| <i>CALCOCO2</i>  | Calcium Binding And Coiled-Coil Domain 2                 | Hs00977443_m1    |
| <i>RNA18S5</i>   | RNA, 18S Ribosomal 5                                     | Hs99999901_s1    |
| <i>NBR1</i>      | NBR1 Autophagy Cargo Receptor                            | Hs00245918_m1    |
| <i>TAX1BP1</i>   | Tax1 Binding Protein 1                                   | Hs00195718_m1    |
| <i>LRSAM1</i>    | Leucine Rich Repeat And Sterile Alpha Motif Containing 1 | Hs01023449_m1    |
| <i>MFN2</i>      | Mitofusin 2                                              | Hs00208382_m1    |
| <i>ULK1</i>      | Unc-51 Like Autophagy Activating Kinase 1                | Hs00177504_m1    |
| <i>ULK2</i>      | Unc-51 Like Autophagy Activating Kinase 2                | Hs00979043_m1    |
| <i>ATG5</i>      | Autophagy Related 5                                      | Hs00169468_m1    |
| <i>ATG7</i>      | Autophagy Related 7                                      | Hs00893766_m1    |
| <i>ATG16L1</i>   | Autophagy Related 16 Like 1                              | Hs01003142_m1    |
| <i>BRD4</i>      | Bromodomain Containing 4                                 | Hs04188087_m1    |
| <i>Rab1A</i>     | RAB1A, Member RAS Oncogene Family                        | Hs00800204_s1    |
| <i>Rab5A</i>     | RAB5A, Member RAS Oncogene Family                        | Hs00702360_s1    |
| <i>Rab7A</i>     | RAB7A, Member RAS Oncogene Family                        | Hs01115139_m1    |
| <i>BECN1</i>     | Beclin 1                                                 | Hs01007018_m1    |
| <i>ATG3</i>      | Autophagy Related 3                                      | Hs00223937_m1    |
| <i>ATG12</i>     | Autophagy Related 12                                     | Hs01047860_g1    |
| <i>ATG14</i>     | Autophagy Related 14                                     | Hs00208732_m1    |
| <i>ATG4B</i>     | Autophagy Related 4B Cysteine Peptidase                  | Hs00367088_m1    |
| <i>PIK3C3</i>    | Phosphatidylinositol 3-Kinase Catalytic Subunit Type 3   | Hs00176908_m1    |
| <i>GATA1</i>     | GATA Binding Protein 1                                   | Hs01085823_m1    |
| <i>VMP1</i>      | Vacuole Membrane Protein 1                               | Hs00978589_m1    |
| <i>GABARAP</i>   | GABA Type A Receptor-Associated Protein                  | Hs00925899_g1    |
| <i>IFNG</i>      | Interferon Gamma                                         | Hs00989291_m1    |
| <i>TNFA</i>      | Tumor Necrosis Factor                                    | Hs00174128_m1    |
| <i>IL6</i>       | Interleukin 6                                            | Hs00174131_m1    |
| <i>IL1B</i>      | Interleukin 1 Beta                                       | Hs01555410_m1    |
| <i>CXCL8</i>     | C-X-C Motif Chemokine Ligand 8                           | Hs00174103_m1    |
| <i>TSLP</i>      | Thymic Stromal Lymphopietin                              | Hs00263639_m1    |
| <i>MMP9</i>      | Matrix Metalloproteinase 9                               | Hs00957562_m1    |
| <i>VEGFA</i>     | Vascular Endothelial Growth Factor A                     | Hs00900055_m1    |
| <i>TLR4</i>      | Toll Like Receptor 4                                     | Hs00152939_m1    |
| <i>TLR2</i>      | Toll Like Receptor 2                                     | Hs02621280_s1    |
| <i>TGFB1</i>     | Transforming Growth Factor Beta 1                        | Hs00998133_m1    |
| <i>IL33</i>      | Interleukin 33                                           | Hs04931857_m1    |
| <i>IL10</i>      | Interleukin 10                                           | Hs00961622_m1    |
| <i>HMBS</i>      | Hydroxymethylbilane Synthase                             | Hs00609297_m1    |
| <i>TBP</i>       | TATA-Box Binding Protein                                 | Hs00427620_m1    |

## Supplementary Fig. S1

nAEC

bAEC

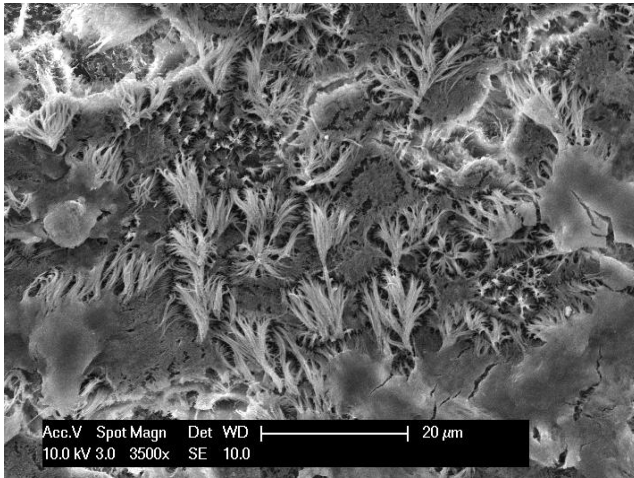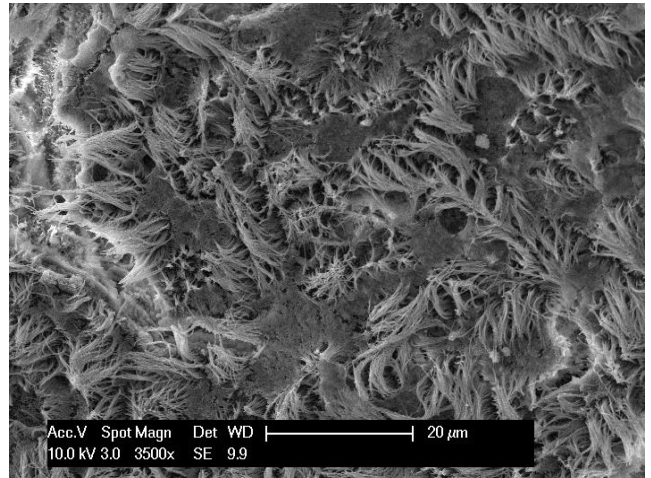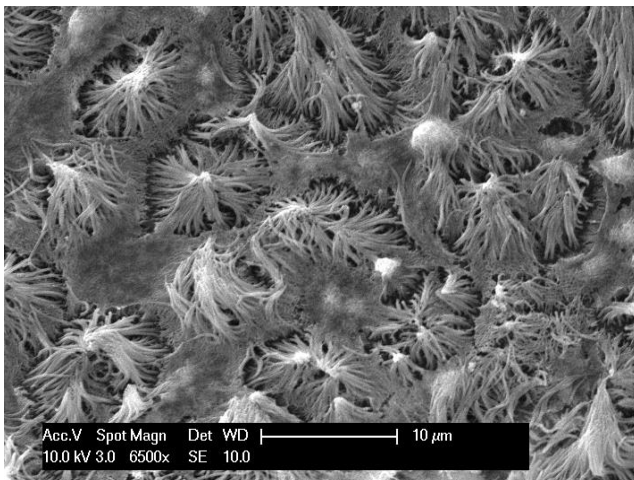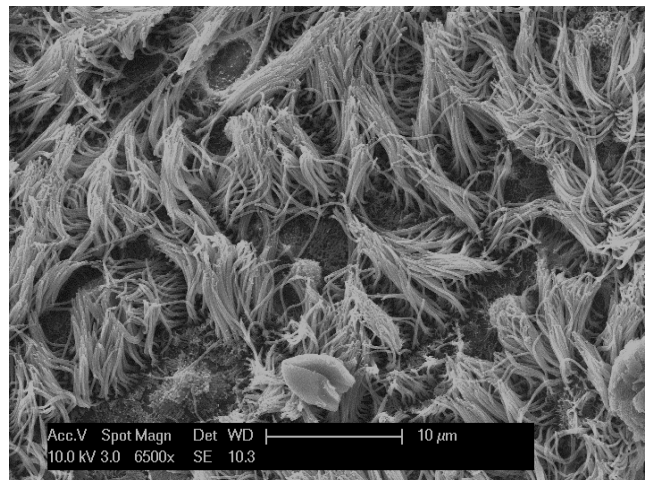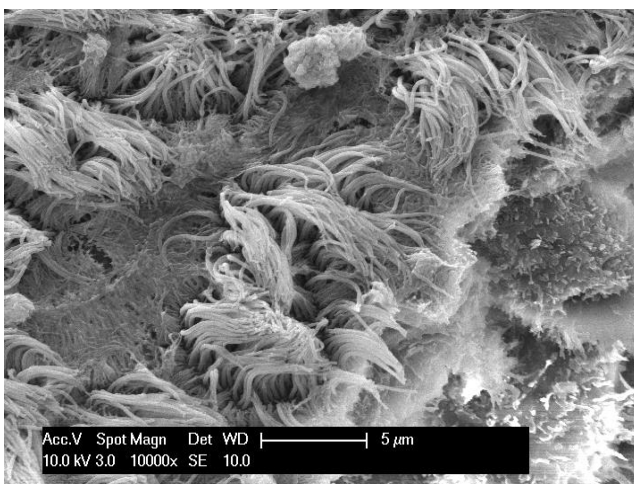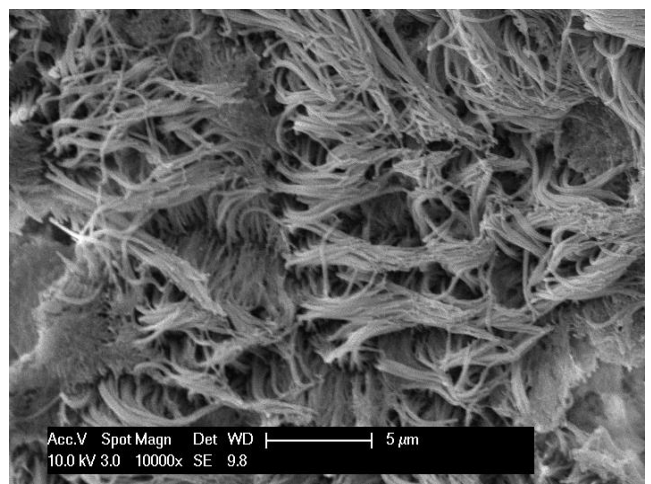

**Supplementary Fig. S1: Scanning electron micrographs of nasal and bronchial cultures.** Scanning electron micrographs showing two further participant nasal airway epithelial (left) and bronchial airway epithelial (right) cultures. Three increasing magnification images are shown from different fields of view.

## Supplementary Fig. S2

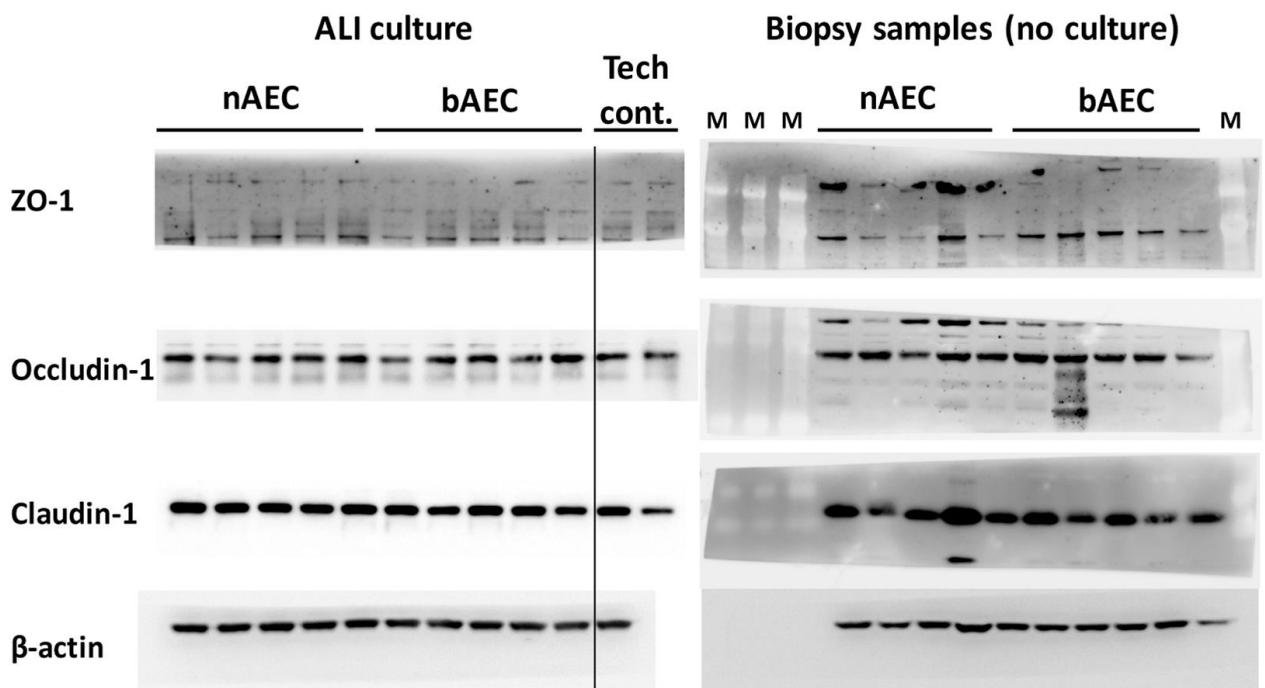

**Supplementary Fig. S2: Original blots corresponding to Fig. 3.** Shown are two technical controls used for outcomes related to Figure 3A for the cultured airway epithelia cells. Lane 11 (second from the right) is a positive control sample made from protein lysate from a previously generated air-liquid interface cultures derived from a commercially sourced primary airway cell (Normal Human Bronchial airway epithelial cells (“NHBE”); Lonza, Australia) that were propagated at an air-liquid interface for 32 days. This provides a standard for tight junction proteins that approximate fully differentiated primary human derived airway cells. Lane 12 (far right hand side) is protein lysate from a previously generated air-liquid interface culture also derived from NHBE cells (Lonza, Australia) that were propagated at an air-liquid interface for 2 days. This provides a standard for tight junction proteins that are partially differentiated in terms of time of epithelial cell exposure to air (vs the conventional 28+ days for complete differentiation). Marker bands are routinely removed before imaging in culture-based experiments to prevent issues related to secondary antibodies binding to the marker protein and competing with the target bands for chemiluminescence signal. The marker lanes (denoted “M”) were kept/imaged for the biopsy samples due to the relative complexity of protein isolates derived from biopsy (vs cultured) samples. This allowed the target protein band molecular weight to be positively identified from spurious signals that are common in complex protein isolates from clinical biopsy specimens.”
